# Supplementary material for: Low Genetic Variability in Bemisia tabaci MEAM1 Populations within Farmscapes of Georgia, USA
Source: PubMed Central journal article supplement (PMC7760769; doi:10.3390/insects11120834), 2020-11-26
Supplement: insects-11-00834-s001.pdf [file insects-11-00834-s001.pdf]

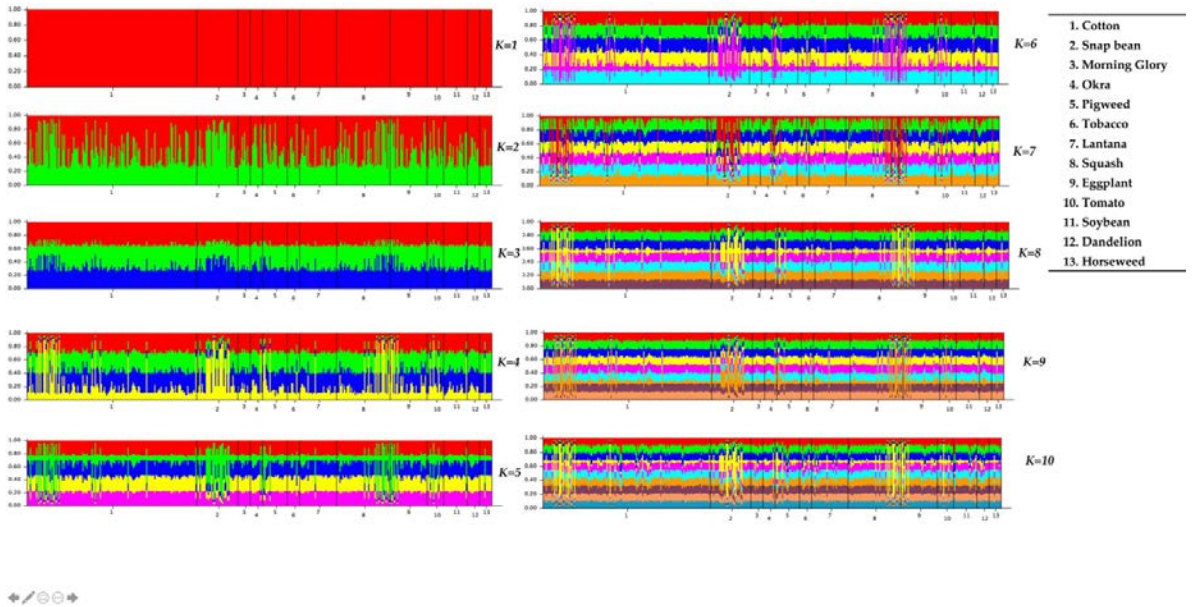

**Figure 1.** Bayesian clustering analysis results for 35 *B. tabaci* MEAM1 populations based on six microsatellite markers using STRUCTURE v.2.3.2. Structure bar plots at  $K = 1-10$ .
